# Supplementary material for: Two stage, nested isothermal amplification in a single tube
Source: Royal Society of Chemistry journal article supplement (doi:10.1039/d0an01835j), 2020-12-17
Supplement: d0an01835j1.pdf [file d0an01835j1.pdf]

## Supporting information

### Two Stage, Nested Isothermal Amplification in a Single Tube

Mohamed El-Tholoth,<sup>\* a,b,c</sup> Eman Anis,<sup>d</sup> and Haim H. Bau<sup>b</sup>

<sup>a</sup> Department of Virology, Faculty of Veterinary Medicine, Mansoura University, Mansoura 35516, Egypt (permanent address)

<sup>b</sup> Department of Mechanical Engineering and Applied Mechanics, University of Pennsylvania, Philadelphia, Pennsylvania 19104, United States.

<sup>c</sup> Health Sciences Division, Veterinary Sciences Program, Al Ain Men's Campus, Higher Colleges of Technology, Al Ain 17155, UAE.

<sup>d</sup> Department of Pathobiology, New Bolton Center, School of Veterinary Medicine, University of Pennsylvania, Kennett Square, Pennsylvania 19348 United States

#### Corresponding author

Corresponding Author

Dr. Mohamed El-Tholoth

Department of Virology

Faculty of Veterinary Medicine Mansoura University

Egypt

Mobile: +2-01008953585

Tel: +2 (050) 2372593, +2 (050) 2372592

Fax: +2 (050) 2379952

E-mail: tholothvirol@mans.edu.eg

ORCID ID: <https://orcid.org/0000-0002-5253-5168>

**Table S-1:** Sequences and concentrations of ILTV and IBV LAMP primers

| Virus<br>(Target Gene)                                                          | Primer Name   | Primers sequences (5' to 3')                            | Concentration<br>(mM) |
|---------------------------------------------------------------------------------|---------------|---------------------------------------------------------|-----------------------|
| ILTV<br>(Polymerase<br>protein coding<br>gene)<br><b>(Unpublished<br/>data)</b> | F3            | GTGGACGACATGATATCGG                                     | 0.2                   |
|                                                                                 | B3            | TTCAGGGTCAGCAAGTATTG                                    | 0.2                   |
|                                                                                 | FIP (F1c +F2) | CGCCACATTCCCTGTACTCTTTTTCTGGTTCTACGTGATTAAGG            | 1.6                   |
|                                                                                 | BIP (B1c +B2) | TGCTATCTGAATGCGCCGTTTACAAGGGTGCTAGGAACA                 | 1.6                   |
|                                                                                 | Loop F        | GTA <del>C</del> TTGTCCTCGCCGTC                         | 0.8                   |
|                                                                                 | Loop B        | AGATGTGGGCAGTGGACTA                                     | 0.8                   |
| IBV<br>(Nucleocapsid<br>protein coding<br>gene) <sup>1</sup>                    | F3            | CCACCTGGTTATAAGGTTGAYC                                  | 0.2                   |
|                                                                                 | B3            | CTACACCATCGACRCACTG                                     | 0.2                   |
|                                                                                 | FIP (F1c +F2) | CATGGCTGCTAGGGACCAGATGACAAGATGAATGAGGAR <del>G</del> GG | 1.6                   |
|                                                                                 | BIP (B1c +B2) | TGACGCCCAA <del>A</del> CTTCAACCAACGTGACACCACAGTAGTA    | 1.6                   |
|                                                                                 | Loop F        | GAGCATTGCTGTAACACGC                                     | 0.8                   |
|                                                                                 | Loop B        | TGGGCTGCACTTGA <del>A</del> ATTG                        | 0.8                   |

Y: C/T ; R: A/G

**Table S-2** : Summary of LAMP reaction and RPA reaction buffers compositions

| <b>LAMP Reaction buffer <sup>2</sup></b>                          |                       | <b>RPA reaction buffer <sup>3</sup></b> |                       |
|-------------------------------------------------------------------|-----------------------|-----------------------------------------|-----------------------|
| Ingredients                                                       | Typical Concentration | Ingredients                             | Typical Concentration |
| Tris-HCl (pH 8.8)                                                 | 20 mM                 | Tris (pH 7.9)                           | 50 mM                 |
| Potassium chloride (KCl)                                          | 10 mM                 | Potassium acetate                       | 100 mM                |
| Betaine                                                           | 0.8 M                 | Phosphocreatine                         | 50 mM                 |
| Ammonium sulphate (NH <sub>4</sub> ) <sub>2</sub> SO <sub>4</sub> | 10 mM                 | Creatine kinase                         | 100 ng/ μL            |
| Magnesium sulphate (MgSO <sub>4</sub> )                           | 8 mM                  | Magnesium acetate                       | 14 mM                 |
| Tween 20                                                          | 0.1%                  | polyethylene glycol (PEG)               | 5%                    |
|                                                                   |                       | Dithiothreitol                          | 2 mM                  |
|                                                                   |                       | Adenosine triphosphate (ATP)            | 3 mM                  |

**Table S-3:** Data used for Probit analysis to calculate limit of detection for Closed-Tube ILTV-Penn-RAMP and IBV-RT-Penn-RAMP

| <b>Genome Concentration (copies/ reaction)</b> | <b>Closed-Tube ILTV-Penn-RAMP (Number positive/tested)</b> | <b>Closed-Tube IBV-RT-Penn-RAMP (Number positive/tested)</b> |
|------------------------------------------------|------------------------------------------------------------|--------------------------------------------------------------|
| 100                                            | 8/8                                                        | 8/8                                                          |
| 80                                             | 8/8                                                        | 8/8                                                          |
| 40                                             | 8/8                                                        | 7/8                                                          |
| 20                                             | 8/8                                                        | 2/8                                                          |
| 15                                             | 1/8                                                        | 1/8                                                          |
| 10                                             | 0/8                                                        | 0/8                                                          |
| 5                                              | 0/8                                                        | 0/8                                                          |
| 0                                              | 0/8                                                        | 0/8                                                          |

**Table S-4** : Results of clinical performance of Closed Tube-Penn RAMP, LAMP and qPCR assays for ILTV and IBV detection:

| Assay                                     | Virus | Clinical Sample No. |       |       |       |       |       |       |       |     |     |
|-------------------------------------------|-------|---------------------|-------|-------|-------|-------|-------|-------|-------|-----|-----|
|                                           |       | 1                   | 2     | 3     | 4     | 5     | 6     | 7     | 8     | 9   | 10  |
| qPCR<br>(Threshold Cycles)                | ILTV  | 22.29               | 23.64 | 24.36 | 30.20 | -ve   | -ve   | -ve   | -ve   | -ve | -ve |
|                                           | IBV   | -ve                 | -ve   | -ve   | -ve   | 23.63 | 26.34 | 32.15 | 34.3  | -ve | -ve |
| LAMP<br>(Threshold time)                  | ILTV  | 15.38               | 16.51 | 19.65 | 24.72 | -ve   | -ve   | -ve   | -ve   | -ve | -ve |
|                                           | IBV   | -ve                 | -ve   | -ve   | -ve   | 22.71 | 25.83 | 28.21 | 28.74 | -ve | -ve |
| Closed Tube-Penn-RAMP<br>(Threshold time) | ILTV  | 4.32                | 9.85  | 10.84 | 15.43 | -ve   | -ve   | -ve   | -ve   | -ve | -ve |
|                                           | IBV   | -ve                 | -ve   | -ve   | -ve   | 10.51 | 12.61 | 14.44 | 15.23 | -ve | -ve |

**References:**

1. M. El-Tholoth, M. G. Mauk, E. Anis, H. H. Bau, *J. Virol. Methods*, 2020, 284, 113940.
2. N. Kuboki, T. Sakurai, F. Di Cello, D.J. Grab, H. Suzuki, C.Sugimoto, I. Igarashi, *J. Clin. Microbiol.* 2003, **41**, 5517-5524.
3. J. Li, J. Macdonald, F. Von Stetten, *Analyst* **2019**, 144, 31-67.
